# Supplementary material for: First Report of Sesame Mutants Tolerant to Severe Drought Stress during Germination and Early Seedling Growth Stages
Source: MDPI journal article supplement (doi:10.3390/plants10061166), 2021-06-08
Supplement: s1 [file s1]

**Table S1:** The average values of all parameters, the germination percentage (GP), the germination rate (GR), mean germination time (MGT), root length (RL), shoot length (SL), root-to-shoot ratio (RSR) and seedling vigor index (SVI) of 13 sesame genotypes evaluated under drought stress for two seed generations M<sub>2</sub> and M<sub>3</sub>.

| Genoty<br>pe | Generati<br>on | Germination<br>percentage (GP) |             |             | Germination rate<br>(GR) |             |             | Mean germination<br>Time (MGT) |             |             | Seedling vigor index<br>(SVI) |             |             | Root length<br>(RL) |                 |                 | Shoot length<br>(SL) |                 |                 | Root/shoot ratio<br>(RSR) |             |                 |
|--------------|----------------|--------------------------------|-------------|-------------|--------------------------|-------------|-------------|--------------------------------|-------------|-------------|-------------------------------|-------------|-------------|---------------------|-----------------|-----------------|----------------------|-----------------|-----------------|---------------------------|-------------|-----------------|
|              |                | 0<br>MPa                       | -0.6<br>MPa | -1.2<br>MPa | 0<br>MPa                 | -0.6<br>MPa | -1.2<br>MPa | 0<br>MPa                       | -0.6<br>MPa | -1.2<br>MPa | 0<br>MPa                      | -0.6<br>MPa | -1.2<br>MPa | 0<br>MP<br>a        | -0.6<br>MP<br>a | -1.2<br>MP<br>a | 0<br>MP<br>a         | -0.6<br>MP<br>a | -1.2<br>MP<br>a | 0<br>MP<br>a              | -0.6<br>MPa | -1.2<br>MP<br>a |
| US06         | M <sub>2</sub> | 99.33                          | 69.25       | 0.00        | 95.14                    | 63.12       | 0.00        | 0.010                          | 0.0354      | 0.000       | 302.                          | 135.44      | 0.00        | 3.32                | 4.9             | 0.00            | 4.82                 | 1.27            | 0.00            | 0.85                      | 0.90        | 0.00            |
|              | M <sub>3</sub> |                                | 65.48       | 0.00        |                          | 52.48       | 0.00        | 5                              | 0.0334      | 0.000       | 45                            | 136.78      | 0.00        |                     | 5.00            | 0.00            |                      | 1.17            | 0.00            | 1.05                      | 0.00        |                 |
| US1-3        | M <sub>2</sub> | 97.00                          | 73.69       | 15.03       | 98.47                    | 73.14       | 23.00       | 0.010                          | 0.0186      | 0.073       | 175.                          | 122.48      | 0.00        | 3.44                | 5.06            | 1.06            | 5.48                 | 1.16            | 0.00            | 0.77                      | 1.11        | 0.00            |
|              | M <sub>3</sub> |                                | 81.25       | 21.33       |                          | 70.35       | 20.55       | 1                              | 0.0192      | 0.078       | 36                            | 121.98      | 0.00        |                     | 5.33            | 0.97            |                      | 1.22            | 0.00            | 1.29                      | 0.00        |                 |
| US1-<br>DL   | M <sub>2</sub> | 98.00                          | 71.65       | 18.33       | 97.82                    | 78.36       | 16.59       | 0.011                          | 0.0177      | 0.090       | 272.                          | 150.81      | 38.19       | 4.7                 | 6.21            | 0.41            | 4.11                 | 2.14            | 0.73            | 1.03                      | 1.2327      | 1.45            |
|              | M <sub>3</sub> |                                | 85.17       | 18.85       |                          | 72.17       | 17.09       |                                | 0.0188      | 0.088       | 15                            | 142.46      | 34.99       |                     | 5.20            | 0.39            |                      | 1.46            | 0.67            | 1.02                      | 1.44        |                 |
| US2-7        | M <sub>2</sub> | 98.33                          | 58.64       | 8.66        | 99.27                    | 48.14       | 13.33       | 0.010                          | 0.0462      | 0.105       | 212.                          | 144.89      | 0.00        | 3.56                | 4.31            | 0.31            | 5.50                 | 1.56            | 0.00            | 0.79                      | 0.39        | 0.00            |
|              | M <sub>3</sub> |                                | 25.78       | 0.00        |                          | 12.78       | 0.00        | 0                              | 0.0367      | 0.000       | 69                            | 146.74      | 0.00        |                     | 3.15            | 0.00            |                      | 1.41            | 0.00            | 0.35                      | 0.00        |                 |
| US1-2        | M <sub>2</sub> | 97.33                          | 55.48       | 0.00        | 26.24                    | 42.60       | 0.00        | 0.010                          | 0.0234      | 0.124       | 320.                          | 140.13      | 15.03       | 3.85                | 5.12            | 0.00            | 5.90                 | 1.98            | 0.41            | 1.22                      | 0.76        | 1.00            |
|              | M <sub>3</sub> |                                | 18.74       | 0.00        |                          | 25.36       | 0.00        | 3                              | 0.0394      | 0.000       | 63                            | 140.4       | 17.34       |                     | 5.30            | 0.00            |                      | 1.99            | 0.53            | 0.85                      | 0.73        |                 |
| US2-1        | M <sub>2</sub> | 99.01                          | 60.34       | 0.00        | 98.87                    | 49.36       | 0.00        | 0.010                          | 0.0202      | 0.000       | 252.                          | 119.89      | 0.00        | 4.32                | 5.32            | 0.00            | 5.36                 | 1.24            | 0.00            | 0.95                      | 1.06        | 0.00            |
|              | M <sub>3</sub> |                                | 58.47       | 0.00        |                          | 45.47       | 0.00        | 1                              | 0.0219      | 0.000       | 66                            | 115.76      | 0.00        |                     | 5.42            | 0.00            |                      | 1.1             | 0.00            | 1.10                      | 0.00        |                 |
| US2-6        | M <sub>2</sub> | 97.33                          | 52.17       | 0.00        | 92.15                    | 33.45       | 0.00        | 0.010                          | 0.0480      | 0.000       | 293.                          | 123.22      | 5.55        | 3.35                | 4.84            | 0.00            | 5.47                 | 1.43            | 0.33            | 0.75                      | 0.78        | 0.93            |
|              | M <sub>3</sub> |                                | 27.35       | 0.00        |                          | 14.35       | 0.00        | 8                              | 0.0560      | 0.000       | 24                            | 114.96      | 0.00        |                     | 3.78            | 0.00            |                      | 1.1             | 0.00            | 0.90                      | 0.00        |                 |
| ML13         | M <sub>2</sub> | 97.02                          | 67.99       | 0.00        | 98.70                    | 67.48       | 0.00        | 0.010                          | 0.0297      | 0.000       | 242.<br>87                    | 162.47      | 0.00        | 3.92                | 5.66            | 0.00            | 4.69                 | 1.36            | 0.00            | 0.81                      | 0.78        | 0.00            |
|              | M <sub>3</sub> |                                | 73.05       | 0.00        |                          | 56.14       | 0.00        |                                | 0.0320      | 0.000       |                               | 166.85      | 0.00        |                     | 5.74            | 0.00            |                      | 1.42            | 0.00            | 0.82                      | 0.00        |                 |
| ML2-10       | M <sub>2</sub> | 100.0                          | 80.36       | 24.00       | 98.97                    | 72.14       | 21.9        | 0.010                          | 0.0138      | 0.075       | 238.                          | 173.25      | 9.10        | 4.34                | 6.33            | 2.33            | 4.98                 | 1.83            | 0.53            | 1.03                      | 1.47        | 0.47            |
|              | M <sub>3</sub> | 0                              | 85.69       | 37.91       |                          | 78.64       | 24.2        | 1                              | 0.0127      | 0.071       | 94                            | 175.14      | 12.67       |                     | 6.25            | 2.05            |                      | 1.71            | 0.64            | 1.39                      | 0.51        |                 |
| ML2-5        | M <sub>2</sub> | 97.66                          | 85.78       | 38.33       | 97.58                    | 82.30       | 41.08       | 0.010                          | 0.0121      | 0.054       | 262.                          | 205.64      | 92.40       | 4.52                | 6.35            | 2.35            | 4.60                 | 2.2             | 1.52            | 1.15                      | 1.49        | 1.53            |
|              | M <sub>3</sub> |                                | 83.55       | 35.02       |                          | 80.25       | 39.93       | 2                              | 0.0124      | 0.055       | 01                            | 192.93      | 121.69      |                     | 6.11            | 2.11            |                      | 2.34            | 1.16            | 1.54                      | 1.76        |                 |
| ML2-37       | M <sub>2</sub> | 97.96                          | 1.32        | 7.33        | 92.95                    | 68.99       | 21.06       | 0.010                          | 0.0203      | 0.077       | 260.                          | 225.48      | 145.67      | 3.99                | 5.36            | 1.05            | 5.30                 | 1.87            | 1.45            | 0.90                      | 1.26        | 1.62            |
|              | M <sub>3</sub> |                                | 77.17       | 9.05        |                          | 64.17       | 26.13       | 6                              | 0.0189      | 0.063       | 26                            | 243.2       | 116.97      |                     | 5.63            | 0.94            |                      | 2.4             | 1.23            | 1.32                      | 1.71        |                 |
| ML2-72       | M <sub>2</sub> | 98.66                          | 57.26       | 11.67       | 97.88                    | 45.69       | 15.67       | 0.010                          | 0.0218      | 0.093       | 241.                          | 127.87      | 8.58        | 3.86                | 4.64            | 0.25            | 5.22                 | 1.53            | 0.63            | 0.89                      | 0.61        | 1.02            |
|              | M <sub>3</sub> |                                | 61.25       | 13.06       |                          | 48.25       | 12.15       | 2                              | 0.0207      | 0.011       | 85                            | 135.45      | 10.50       |                     | 3.42            | 0.33            |                      | 1.68            | 0.74            | 0.55                      | 1.12        |                 |
| ML2-68       | M <sub>2</sub> | 96.96                          | 42.6        | 0.00        | 96.78                    | 33.69       | 0.00        | 0.010                          | 0.0296      | 0.000       | 257.                          | 122.94      | 0.00        | 3.77                | 4.72            | 0.00            | 4.95                 | 1.45            | 0.00            | 0.92                      | 0.69        | 0.00            |
|              | M <sub>3</sub> |                                | 29.78       | 0.00        |                          | 34.00       | 0.00        | 3                              | 0.0294      | 0.000       | 25                            | 128.65      | 0.00        |                     | 4.98            | 0.00            |                      | 1.31            | 0.00            | 0.94                      | 0.00        |                 |
